# Supplementary material for: Human-AI interaction in skin cancer diagnosis: a systematic review and meta-analysis
Source: Springer Nature journal article supplement (doi:10.1038/s41746-024-01031-w), 2024-04-09
Supplement: 41746_2024_1031_MOESM1_ESM.pdf [file 41746_2024_1031_MOESM1_ESM.pdf]

## Supplementary Material

**Supplementary Table 1. Assessment of methodological quality of studies using QUADAS-2**

| Study            | Risk of bias      |            |                    |                 | Applicability concerns |            |                    |
|------------------|-------------------|------------|--------------------|-----------------|------------------------|------------|--------------------|
|                  | Patient selection | Index test | Reference standard | Flow and timing | Patient selection      | Index test | Reference standard |
| Cho 2020         | Low               | Low        | Low                | Low             | Low                    | Low        | Low                |
| Han 2020         | Low               | Low        | Low                | low             | Low                    | Low        | Low                |
| Han 2022         | Low               | Low        | Low                | Low             | Low                    | Unclear    | Low                |
| Jahn 2022        | High              | Low        | High               | High            | High                   | Unclear    | High               |
| Kim 2022         | Low               | Low        | Low                | Low             | Low                    | Low        | Low                |
| Lee 2020         | Low               | Low        | Low                | Low             | Low                    | Low        | Low                |
| Tschandl 2020    | Low               | Low        | Low                | Low             | Low                    | Low        | Low                |
| Maron 2020       | Low               | Low        | Low                | Unclear         | Low                    | Low        | Low                |
| Lucius 2020      | Unclear           | Low        | Low                | Low             | Unclear                | Low        | Low                |
| Ba 2022          | Low               | Low        | Low                | Low             | Low                    | Low        | Low                |
| Jain 2021        | Low               | Low        | Low                | Low             | Low                    | Low        | Low                |
| Muñoz-López 2021 | Low               | Low        | Low                | Low             | Low                    | Low        | Low                |

## Supplementary Figure 1. Deek's Funnel Plot Asymmetry Test

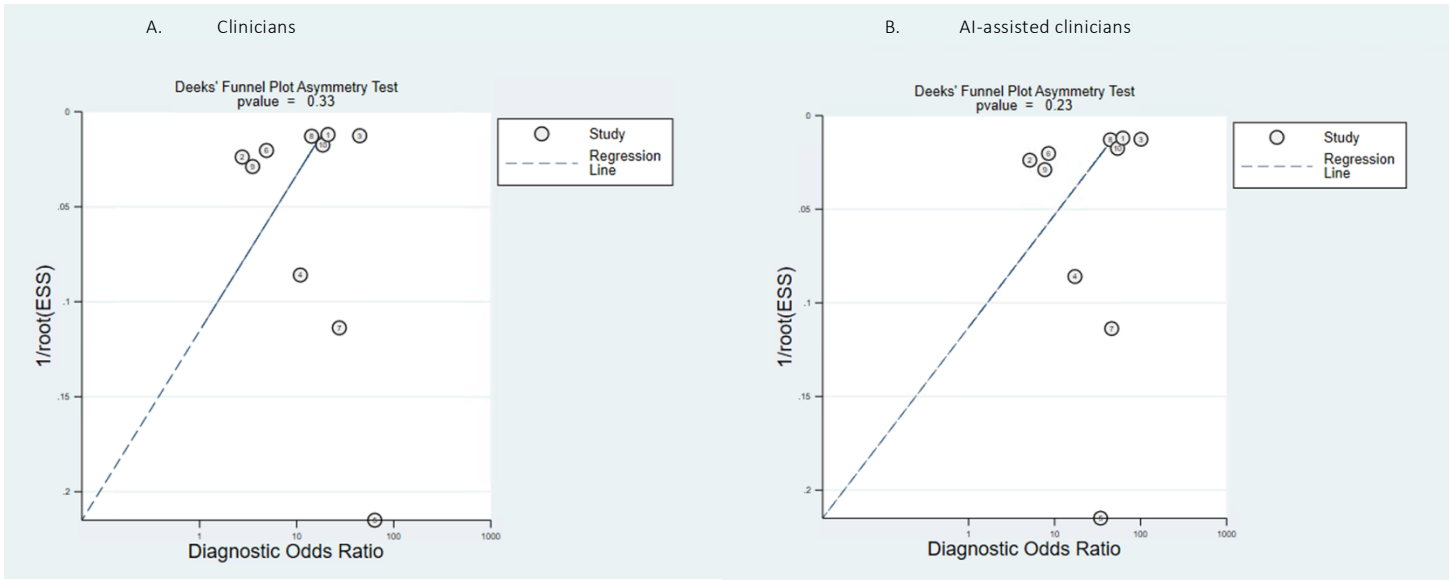

## Supplementary Table 2. Sensitivity analyses

|                                                                         | Clinicians |                                   | AI-assisted clinicians |                                   |
|-------------------------------------------------------------------------|------------|-----------------------------------|------------------------|-----------------------------------|
| Overall                                                                 | SE         | 74.8% (68.6-80.1)                 | SE                     | 81.1% (74.4-86.5)                 |
|                                                                         | SP         | 81.5% (73.9-87.3)                 | SP                     | 86.1% (79.2-90.9)                 |
| Without outliers                                                        | SE         | 78.8% (75.1-82.1) <sup>1,2</sup>  | SE                     | 83.7% (78.8-87.7) <sup>1</sup>    |
|                                                                         | SP         | 83.6% (78.0 – 88.1) <sup>3</sup>  | SP                     | 89.4% (86.6-91.7) <sup>2,3</sup>  |
| Without low-quality study                                               | SE         | 74.2% (68.0-79.6) <sup>4</sup>    | SE                     | 89.4% (86.6-91.7) <sup>4</sup>    |
|                                                                         | SP         | 80.2% (72.2-86.3) <sup>4</sup>    | SP                     | 85.9% (78.3-91.2) <sup>4</sup>    |
| Without studies with reference standards other than only histopathology | SE         | 75.5 (56.3-88.0) <sup>3,5-9</sup> | SE                     | 78.2 (62.9-88.3) <sup>3,5-9</sup> |
|                                                                         | SP         | 78.6 (72.3-83.8) <sup>3,5-9</sup> | SP                     | 83.6 (77.0-88.7) <sup>3,5-9</sup> |

Abbreviations: SE: sensitivity, SP: specificity. Reference indicates the outliers, low-quality study or studies not only using histopathology as reference standard, that were excluded from the analyses. <sup>1</sup>Jain et al. 2021, DOI: 10.1001/jamanetworkopen.2021.7249. <sup>2</sup>Maron et al. 2020, DOI: 10.2196/18091. <sup>3</sup>Cho et al. 2020, DOI: 10.1111/bjd.18459. <sup>4</sup>Jahn et al. 2022, DOI: 10.3390/cancers14153829. <sup>5</sup>Han et al. 2022, DOI: 10.1016/j.jid.2022.02.003. <sup>6</sup>Han et al. 2020, DOI: 10.1016/j.jid.2020.01.019. <sup>7</sup>Kim et al. 2022, DOI: 10.1371/journal.pone.0260895. <sup>8</sup>Lee et al. 2020, DOI: 10.1111/jdv.16185. <sup>9</sup>Tschandl et al. 2020, DOI: 10.1038/s41591-020-0942-0

### Supplementary Table 3: Search Strategy

| Set # | Concept                                                                       | Syntax                                                                                                                                                                                                                                                                                                                                                                                                                                                           | Results    |
|-------|-------------------------------------------------------------------------------|------------------------------------------------------------------------------------------------------------------------------------------------------------------------------------------------------------------------------------------------------------------------------------------------------------------------------------------------------------------------------------------------------------------------------------------------------------------|------------|
| 1     | Artificial Intelligence                                                       | "Artificial Intelligence" [mesh] OR "Neural Networks, Computer"[Mesh] OR "Artificial Intelligence" [tw] OR "Neural Network" [tw] OR "Neural Networks"[tw] OR "Deep Learning" [tw] OR "Machine Learning" [tw] OR "algorithm*" [tw] OR "augmented intelligence" [tw]                                                                                                                                                                                               | 663,431    |
| 2     | Skin cancer                                                                   | "skin neoplasms"[MeSH Terms] OR "Melanoma"[Mesh] OR "Skin Diseases"[MeSH Terms:noexp] OR "skin neoplasms" [tw] OR "skin neoplasm" [tw] OR "skin cancer" [tw] OR "skin cancers" [tw] OR "cancer of the skin" [tw] OR melanoma [tw] OR melanomas [tw] OR "skin diseases" [tw] OR "skin disease" [tw] OR ((skin [tw]) AND (lesion [tw] OR lesions [tw] OR malignant [tw] OR malignancy [tw] OR malignancies [tw])) OR "skin tumor*" [tw] OR "cutaneous tumor*" [tw] | 418,646    |
| 3     | Diagnosis                                                                     | "Diagnosis"[Mesh] OR "diagnosis" [Subheading] OR "Diagnostic Imaging"[Mesh] OR "diagnostic imaging" [Subheading] OR diagnos* [tw] OR detect* [tw] OR recognition [tw] OR classification [tw] OR classify [tw]                                                                                                                                                                                                                                                    | 13,515,457 |
| 4     | Doctors or dermatologists                                                     | "Physicians"[Mesh] OR physician* [tw] OR doctor* [tw] OR provider* [tw] OR dermatologist* [tw] OR Practitioner* [tw] OR clinician* [tw]                                                                                                                                                                                                                                                                                                                          | 1,312,282  |
| 5     | combining                                                                     | #1 AND #2 AND #3 AND #4                                                                                                                                                                                                                                                                                                                                                                                                                                          | 862        |
| 6     | Limit to published 2017 to present, exclude reviews, case reports, editorials | #5 AND 2017:3000[dp] NOT ("Review" [Publication Type] OR "Case Reports" [Publication Type] OR "Editorial" [Publication Type])                                                                                                                                                                                                                                                                                                                                    | 433        |

Embase Search Strategy:  
Date searched: 11/8/22

| Set # | Concept                 | Syntax                                                                                                                                                                                                                                                                                                                                                                                        | Results |
|-------|-------------------------|-----------------------------------------------------------------------------------------------------------------------------------------------------------------------------------------------------------------------------------------------------------------------------------------------------------------------------------------------------------------------------------------------|---------|
| 1     | Artificial Intelligence | 'artificial intelligence'/exp OR 'machine learning'/exp OR 'Artificial Intelligence':ti,ab,kw OR 'Neural Network':ti,ab,kw OR 'Neural Networks':ti,ab,kw OR 'Deep Learning':ti,ab,kw OR 'Machine Learning':ti,ab,kw OR 'algorithm*':ti,ab,kw OR 'augmented intelligence':ti,ab,kw                                                                                                             | 747,280 |
| 2     | Skin cancer             | 'skin tumor'/exp OR 'melanoma'/exp OR 'skin disease'/de OR 'skin neoplasms':ti,ab,kw OR 'skin neoplasm':ti,ab,kw OR 'skin cancer':ti,ab,kw OR 'skin cancers':ti,ab,kw OR 'cancer of the skin':ti,ab,kw OR melanoma:ti,ab,kw OR melanomas:ti,ab,kw OR 'skin diseases':ti,ab,kw OR 'skin disease':ti,ab,kw OR ((skin:ti,ab,kw) AND (lesion:ti,ab,kw OR lesions:ti,ab,kw OR malignant:ti,ab,kw)) | 674,115 |

OR malignancy:ti,ab,kw OR malignancies:ti,ab,kw)) OR 'skin tumor\*':ti,ab,kw OR 'cutaneous tumor\*':ti,ab,kw

|   |                                                                               |                                                                                                                                                                                 |            |
|---|-------------------------------------------------------------------------------|---------------------------------------------------------------------------------------------------------------------------------------------------------------------------------|------------|
| 3 | Diagnosis                                                                     | 'diagnosis'/exp OR 'diagnostic imaging'/exp OR 'diagnosis'/lnk OR diagnos*:ti,ab,kw OR detect*:ti,ab,kw OR recognition:ti,ab,kw OR classification:ti,ab,kw OR classify:ti,ab,kw | 13,619,444 |
| 4 | Doctors or dermatologists                                                     | 'physician'/exp OR physician*:ti,ab,kw OR doctor*:ti,ab,kw OR provider*:ti,ab,kw OR dermatologist*:ti,ab,kw OR Practitioner*:ti,ab,kw OR clinician*:ti,ab,kw                    | 2,120,134  |
| 5 | combining                                                                     | #1 AND #2 AND #3 AND #4                                                                                                                                                         | 1,488      |
| 6 | Limit to published 2017 to present, exclude reviews, case reports, editorials | #5 AND [2017-2022]/py NOT ('case report'/de OR 'editorial'/it OR 'review'/it)                                                                                                   | 825        |

Scopus Search Strategy:  
Date searched: 11/08/22

| Set # | Concept                                                                       | Syntax                                                                                                                                                                                                                                                                                             | Results    |
|-------|-------------------------------------------------------------------------------|----------------------------------------------------------------------------------------------------------------------------------------------------------------------------------------------------------------------------------------------------------------------------------------------------|------------|
| 1     | Artificial Intelligence                                                       | TITLE-ABS-KEY("Artificial Intelligence" OR "Neural Network" OR "Neural Networks" OR "Deep Learning" OR "Machine Learning" OR "algorithm*" OR "augmented intelligence")                                                                                                                             | 4,589,018  |
| 2     | Skin cancer                                                                   | TITLE-ABS-KEY ("skin neoplasms" OR "skin neoplasm" OR "skin cancer" OR "skin cancers" OR "cancer of the skin" OR melanoma OR melanomas OR "skin diseases" OR "skin disease" OR ((skin) AND (lesion OR lesions OR malignant OR malignancy OR malignancies)) OR "skin tumor*" OR "cutaneous tumor*") | 573,258    |
| 3     | Diagnosis                                                                     | TITLE-ABS-KEY (diagnos* OR detect* OR recognition OR classification OR classify)                                                                                                                                                                                                                   | 12,881,019 |
| 4     | Doctors or dermatologists                                                     | TITLE-ABS-KEY (physician* OR doctor* OR provider* OR dermatologist* OR Practitioner* OR clinician*)                                                                                                                                                                                                | 2,044,478  |
| 5     | combining                                                                     | #1 AND #2 AND #3 AND #4                                                                                                                                                                                                                                                                            | 1,733      |
| 6     | Limit to published 2017 to present, exclude reviews, case reports, editorials | #5 AND ( LIMIT-TO ( PUBYEAR , 2023 ) OR LIMIT-TO ( PUBYEAR , 2022 ) OR LIMIT-TO ( PUBYEAR , 2021 ) OR LIMIT-TO ( PUBYEAR , 2020 ) OR LIMIT-TO ( PUBYEAR , 2019 ) OR LIMIT-TO ( PUBYEAR , 2018 ) OR LIMIT-TO ( PUBYEAR , 2017 ) ) AND ( EXCLUDE ( DOCTYPE , "re" ) OR EXCLUDE ( DOCTYPE , "ed" ) )  | 1,030      |

IEEE Search Strategy:  
Date searched: 11/08/22

| Set # | Concept                                                                       | Syntax                                                                                                                                                                                                                                                              | Results   |
|-------|-------------------------------------------------------------------------------|---------------------------------------------------------------------------------------------------------------------------------------------------------------------------------------------------------------------------------------------------------------------|-----------|
| 1     | Artificial Intelligence                                                       | "Artificial Intelligence" OR "Neural Network" OR "Neural Networks" OR "Deep Learning" OR "Machine Learning" OR "algorithm*" OR "augmented intelligence"                                                                                                             | 1,440,890 |
| 2     | Skin cancer                                                                   | "skin neoplasms" OR "skin neoplasm" OR "skin cancer" OR "skin cancers" OR "cancer of the skin" OR melanoma OR melanomas OR "skin diseases" OR "skin disease" OR "skin tumor*" OR "cutaneous tumor*" OR lesion OR lesions OR malignant OR malignancy OR malignancies | 16,357    |
| 3     | Diagnosis                                                                     | diagnos* OR detect* OR recognition OR classification OR classify                                                                                                                                                                                                    | 1,124,080 |
| 4     | Doctors or dermatologists                                                     | physician* OR doctor* OR provider* OR dermatologist* OR Practitioner* OR clinician*                                                                                                                                                                                 | 87,163    |
| 5     | combining                                                                     | #1 AND #2 AND #3 AND #4                                                                                                                                                                                                                                             | 963       |
| 6     | Limit to published 2017 to present, exclude reviews, case reports, editorials | #5 AND limit to 2017-2022                                                                                                                                                                                                                                           | 687       |
